# Supplementary material for: Characterization of the diffusive dynamics of particles with time-dependent asymmetric microscopy intensity profiles
Source: Royal Society of Chemistry journal article supplement (doi:10.1039/c6sm00946h), 2016-01-01
Supplement: c6sm00946h3.pdf [file c6sm00946h3.pdf]

**Supporting Information**

***“Characterization of the diffusive dynamics of particles with time-dependent asymmetric microscopy intensity profiles” by Maria A. Vorontsova, Peter G. Vekilov, and Dominique Maes.***

Supplementary Movie I

Time-lapse overexposed movie of a glucose isomerase solution at 30mg ml<sup>-1</sup> concentration recorded with a Nanosight TM Microscope. The images were captured at 30 frames s<sup>-1</sup> and were cropped to a region containing only one cluster.

Supplementary Movie II

Movie of the spatial cross-correlation functions of the images from Movie I. The first image was used as reference. Note that the axes are reversed.
